# Supplementary material for: Attention Allocation in Information-Rich Environments: The Case of News Aggregators
Source: Atypon-hosted journal article supplement (doi:10.1287/mnsc.2015.2237), 2015-12-10
Supplement: mnsc.2015.2237-sm-appendix_2015_accepted.pdf [file mnsc.2015.2237-sm-appendix_2015_accepted.pdf]

# Attention Allocation in Information-Rich Environments:

## The Case of News Aggregators

Chrysanthos Dellarocas, Questrom School of Business, Boston University, Boston, MA 02215,  
[dell@bu.edu](mailto:dell@bu.edu)

Juliana Sutanto, Management Science Department, Lancaster University, Bailrigg, Lancaster, Lancashire  
LA1 4YX, United Kingdom, [j.sutanto@lancaster.ac.uk](mailto:j.sutanto@lancaster.ac.uk)

Mihai Calin, The Boston Consulting Group AG (Switzerland), Munstergasse 2, Zurich 8001, Switzerland,  
[cm.calin@gmail.com](mailto:cm.calin@gmail.com)

Elia Palme, Newscron SA, Via Carlo Maderno 24, Lugano 6900, Switzerland, [elia.palme@newscron.com](mailto:elia.palme@newscron.com)

### ONLINE APPENDIX

#### Descriptive Statistics of Data Sets Used in this Study

##### A.1 List of Newscron data sources.

| Name                 | Website                                                | Language | Circulation (2012)* | Free/Paid* | Log frequency** |
|----------------------|--------------------------------------------------------|----------|---------------------|------------|-----------------|
| Blick                | <a href="http://blick.ch">blick.ch</a>                 | German   | 275,000             | Paid       | 1,492 (5%)      |
| Neue Zürcher Zeitung | <a href="http://nzz.ch">nzz.ch</a>                     | German   | 330,000             | Paid       | 2,729 (10%)     |
| 20 Minuten           | <a href="http://20min.ch">20min.ch</a>                 | German   | 329,000             | Free       | 5,034 (18%)     |
| Tages Anzeiger       | <a href="http://tagesanzeiger.ch">tagesanzeiger.ch</a> | German   | 216,000             | Paid       | 3,400 (12%)     |
| Basler Zeitung       | <a href="http://bazonline.ch">bazonline.ch</a>         | German   | 165,000             | Paid       | 1,546 (5%)      |
| Berner Zeitung       | <a href="http://bernerzeitun.ch">bernerzeitun.ch</a>   | German   | 165,000             | Paid       | 2,064 (7%)      |
| 24 Heures            | <a href="http://24heures.ch">24heures.ch</a>           | French   | 86,000              | Paid       | 1,266 (4%)      |
| Le Matin             | <a href="http://lematin.ch">lematin.ch</a>             | French   | 69,000              | Paid       | 802 (3%)        |
| 20 minutes           | <a href="http://20min.ch/ro/">20min.ch/ro/</a>         | French   | 221,000             | Free       | 1,208 (4%)      |
| Tribune de Genève    | <a href="http://tdg.ch">tdg.ch</a>                     | French   | 67,000              | Paid       | 665 (2%)        |
| TIO (Ticino Online)  | <a href="http://tio.ch">tio.ch</a>                     | Italian  | N/A                 | Free       | 2,591 (9%)      |
| Corriere del Ticino  | <a href="http://cdt.ch">cdt.ch</a>                     | Italian  | 40,000              | Paid       | 3,002 (10%)     |
| Ticino News          | <a href="http://ticinonews.ch">ticinonews.ch</a>       | Italian  | N/A                 | Free       | 2,807 (10%)     |

\* Circulation and Free/Paid refer to print edition; N/A implies no print edition.

\*\* Instances and percentage of article access sessions in the iPhone data set.

A.2. Descriptive statistics of iPhone sessions with only one article (dataset used in Section 5.1)

| Total number of samples: 21,261 single article sessions |                  |        |        |          |         |
|---------------------------------------------------------|------------------|--------|--------|----------|---------|
| <b>Categorical Variables</b>                            |                  |        |        |          |         |
| <b>Variable</b>                                         | <b>Frequency</b> |        |        | <b>%</b> |         |
| snippet-98                                              | 3,463            |        |        | 16.29    |         |
| snippet-147                                             | 3,427            |        |        | 16.12    |         |
| snippet-196                                             | 3,468            |        |        | 16.31    |         |
| snippet-245                                             | 3,619            |        |        | 17.02    |         |
| snippet-294                                             | 3,546            |        |        | 16.68    |         |
| snippet-343                                             | 3,738            |        |        | 17.58    |         |
| has-image                                               | 17,079           |        |        | 80.33    |         |
| (no-image)                                              | 4,182            |        |        | 19.67    |         |
| category-int.                                           | 5,033            |        |        | 23.67    |         |
| category-local                                          | 5,445            |        |        | 25.61    |         |
| category-business                                       | 2,179            |        |        | 10.25    |         |
| category-technology                                     | 2,311            |        |        | 10.87    |         |
| category-entertain                                      | 2,673            |        |        | 12.57    |         |
| category-sports                                         | 1,373            |        |        | 6.46     |         |
| category-life                                           | 1,057            |        |        | 4.97     |         |
| category-motors                                         | 340              |        |        | 1.60     |         |
| category-culture                                        | 850              |        |        | 4.00     |         |
| time-morning                                            | 5,052            |        |        | 23.76    |         |
| time-lunch                                              | 3,874            |        |        | 18.22    |         |
| time-afterwork                                          | 3,663            |        |        | 17.23    |         |
| time-afterdinner                                        | 4,488            |        |        | 21.11    |         |
| time-other                                              | 4,184            |        |        | 19.68    |         |
| language-german                                         | 12,279           |        |        | 57.76    |         |
| language-french                                         | 2,787            |        |        | 13.11    |         |
| language-italian                                        | 6,195            |        |        | 29.14    |         |
| <b>Continuous Variable</b>                              |                  |        |        |          |         |
|                                                         | Min              | Max    | Median | Mean     | Std.Dev |
| topic-age                                               | 0                | 116.44 | 0.28   | 1.18     | 4.27    |

### A.3. Descriptive statistics iPad lead article dataset (used in Section 5.1)

| Total number of samples: 65,500 'first stage' display sessions (see Figure 4a) |                  |          |
|--------------------------------------------------------------------------------|------------------|----------|
| <b>Categorical Variables</b>                                                   |                  |          |
| <b>Variable</b>                                                                | <b>Frequency</b> | <b>%</b> |
| snippet-0                                                                      | 9,193            | 14.04    |
| snippet-98                                                                     | 9,362            | 14.29    |
| snippet-147                                                                    | 9,523            | 14.54    |
| snippet-196                                                                    | 9,504            | 14.51    |
| snippet-245                                                                    | 9,117            | 13.92    |
| snippet-294                                                                    | 9,329            | 14.24    |
| snippet-343                                                                    | 9,472            | 14.46    |
| category-int.                                                                  | 20,576           | 31.41    |
| category-local                                                                 | 9,750            | 14.89    |
| category-business                                                              | 5,266            | 8.04     |
| category-technology                                                            | 5,869            | 8.96     |
| category-entertain                                                             | 5,405            | 8.25     |
| category-sports                                                                | 5,023            | 7.67     |
| category-life                                                                  | 4,632            | 7.07     |
| category-motors                                                                | 3,719            | 5.68     |
| category-culture                                                               | 5,260            | 8.03     |
| time-morning                                                                   | 13,751           | 20.99    |
| time-lunch                                                                     | 9,883            | 15.09    |
| time-afterwork                                                                 | 12,512           | 19.10    |
| time-afterdinner                                                               | 17,183           | 26.23    |
| time-other                                                                     | 12,171           | 18.58    |
| language-german                                                                | 26,271           | 40.11    |
| language-french                                                                | 12,193           | 18.62    |
| language-italian                                                               | 27,036           | 41.28    |

#### A.4. Descriptive statistics of iPad secondary article dataset (used in Section 5.1)

| Total number of samples: 37,703 'first stage' display sessions (see Figure 4a) |                  |          |
|--------------------------------------------------------------------------------|------------------|----------|
| <b>Categorical Variables</b>                                                   |                  |          |
| <b>Variable</b>                                                                | <b>Frequency</b> | <b>%</b> |
| has-image                                                                      | 16,130           | 42.78    |
| (no-image)                                                                     | 21,573           | 57.22    |
| category-int.                                                                  | 7,792            | 20.67    |
| category-local                                                                 | 3,795            | 10.07    |
| category-business                                                              | 5,300            | 14.06    |
| category-technology                                                            | 4,892            | 12.98    |
| category-entertain                                                             | 4,591            | 12.18    |
| category-sports                                                                | 3,952            | 10.48    |
| category-life                                                                  | 2,780            | 7.37     |
| category-motors                                                                | 4,272            | 11.33    |
| category-culture                                                               | 329              | 0.87     |
| time-morning                                                                   | 7,606            | 20.17    |
| time-lunch                                                                     | 5,785            | 15.34    |
| time-afterwork                                                                 | 7,243            | 19.21    |
| time-afterdinner                                                               | 10,039           | 26.63    |
| time-other                                                                     | 7,030            | 18.65    |
| language-german                                                                | 16,974           | 45.02    |
| language-french                                                                | 7,449            | 19.76    |
| language-italian                                                               | 13,280           | 35.22    |

## A.5. Descriptive statistics of iPhone session dataset (used in Section 5.2)

| Total number of samples: 25,520 topic access sessions |                  |        |        |          |         |
|-------------------------------------------------------|------------------|--------|--------|----------|---------|
| <b>Categorical Variables</b>                          |                  |        |        |          |         |
| <b>Variable</b>                                       | <b>Frequency</b> |        |        | <b>%</b> |         |
| related-snippets-1                                    | 21,261           |        |        | 83.31    |         |
| related-snippets-2                                    | 3,498            |        |        | 13.71    |         |
| related-snippets-3                                    | 415              |        |        | 1.63     |         |
| related-snippets-4 or more                            | 346              |        |        | 1.35     |         |
| category-int.                                         | 6,342            |        |        | 24.85    |         |
| category-local                                        | 6,487            |        |        | 25.42    |         |
| category-business                                     | 2,789            |        |        | 10.93    |         |
| category-technology                                   | 2,659            |        |        | 10.42    |         |
| category-entertain                                    | 2,976            |        |        | 11.66    |         |
| category-sports                                       | 1,774            |        |        | 6.95     |         |
| category-life                                         | 1,176            |        |        | 4.61     |         |
| category-motors                                       | 357              |        |        | 1.40     |         |
| category-culture                                      | 960              |        |        | 3.76     |         |
| time-morning                                          | 5,956            |        |        | 23.34    |         |
| time-lunch                                            | 4,650            |        |        | 18.22    |         |
| time-afterwork                                        | 4,451            |        |        | 17.44    |         |
| time-afterdinner                                      | 5,443            |        |        | 21.33    |         |
| time-other                                            | 5,020            |        |        | 19.67    |         |
| language-german                                       | 14,615           |        |        | 57.27    |         |
| language-french                                       | 3,425            |        |        | 13.42    |         |
| language-italian                                      | 7,480            |        |        | 29.31    |         |
| <b>Continuous Variable</b>                            |                  |        |        |          |         |
|                                                       | Min              | Max    | Median | Mean     | Std.Dev |
| topic-age                                             | 0                | 116.44 | 0.32   | 1.27     | 4.07    |
